# Supplementary material for: miR-199a-3p Modulates MTOR and PAK4 Pathways and Inhibits Tumor Growth in a Hepatocellular Carcinoma Transgenic Mouse Model
Source: PubMed Central journal article supplement — Mol Ther Nucleic Acids. 2018 Apr 12;11:485–93. doi: 10.1016/j.omtn.2018.04.002 (PMC5992479; doi:10.1016/j.omtn.2018.04.002), 2018-04-12
Supplement: mmc1.pdf [file mmc1.pdf]

## **Supplemental Information**

### **miR-199a-3p Modulates MTOR and PAK4 Pathways and Inhibits Tumor Growth in a Hepatocellular Carcinoma Transgenic Mouse Model**

**Elisa Callegari, Lucilla D'Abundo, Paola Guerriero, Carolina Simioni, Bahaeldin K. Elamin, Marta Russo, Alice Cani, Cristian Bassi, Barbara Zagatti, Luciano Giacomelli, Stella Blandamura, Farzaneh Moshiri, Simona Ultimo, Antonio Frassoldati, Giuseppe Altavilla, Laura Gramantieri, Luca Maria Neri, Silvia Sabbioni, and Massimo Negrini**

## SUPPLEMENTAL FIGURES

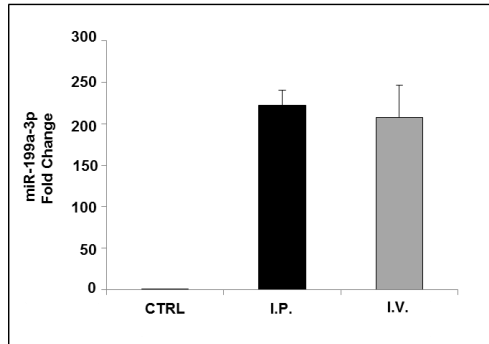

**Figure S1. Comparison between intraperitoneal and intravenous systemic administration approaches for *in vivo* miRNA delivery.** To find the most efficient and functional route for miRNA administration, intraperitoneal (I.P.) and intravenous (I.V.) injection approaches were compared. Mice received a single dose (2,5mg/kg) of miR-199a-3p by I.P. (n=3) or by I.V. (n=3). Three untreated mice were used as control (CTRL). After 24h, the animals were sacrificed and the levels of miR-199a-3p in livers measured by droplet digital polymerase chain reaction (ddPCR). Results (represented as mean + SD) show that efficacy of the two systemic approaches was comparable.

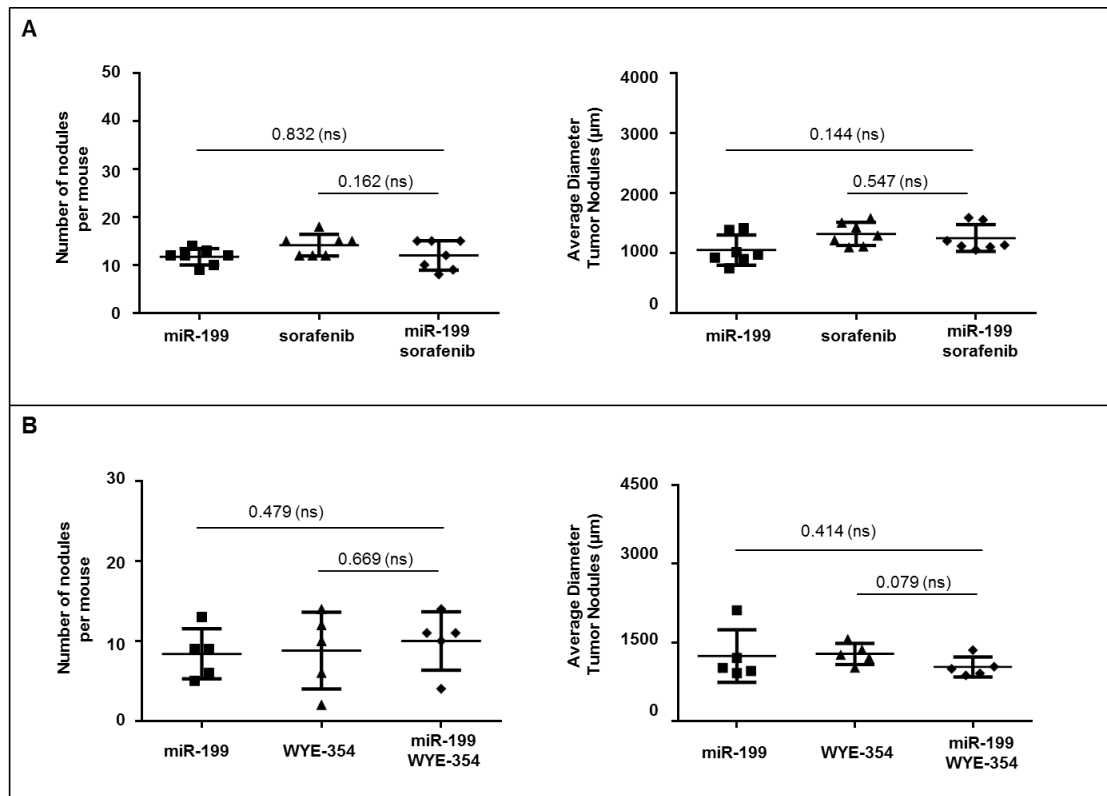

**Figure S2. The combination of miR-199a-3p with sorafenib or WYY-354 does not elicit an additive effect.** To verify a possible additive anti-tumor effect due to the combination of miR-199a-3p and the tested compounds, additional groups of mice were established. (A) In the context of the experiment described in Figure 1D, 7 mice received a combination of miR-199a-3p and sorafenib. No significant effect on the number and size of nodules was detected. (B) In the context of the experiment described in Figure 4, 5 mice received a combination of miR-199a-3p and WYE-354. No significant differences were observed between single agents and their combination.

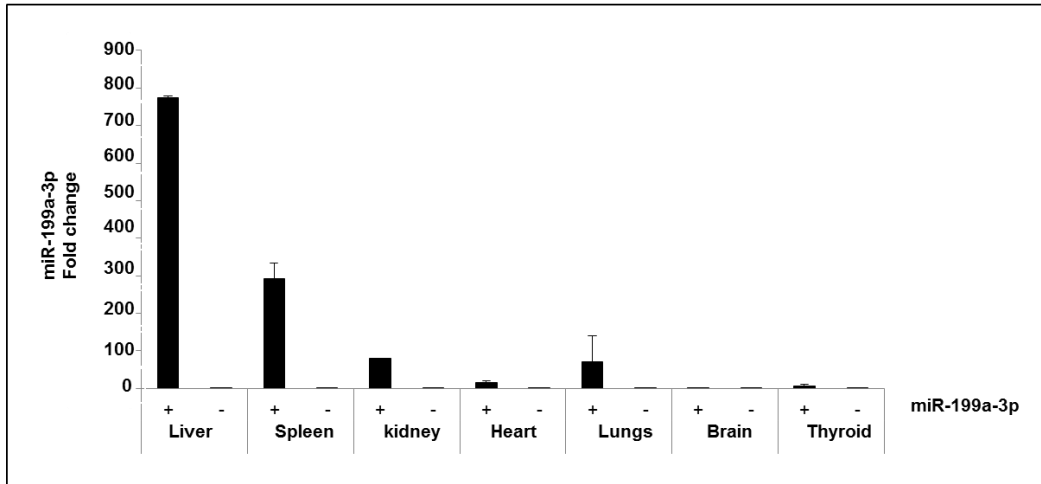

**Figure S3. Distribution of miR-199a-3p in various mouse organs following its i.p. administration.** To show the delivery of miR-199a-3p molecules *in vivo*, a droplet digital polymerase chain reaction (ddPCR) analysis was performed on several mouse organs. Mice injected with the miRNA (+) were compared with untreated animals (-). All the data represent an average from three animals of each condition (mean + SD)

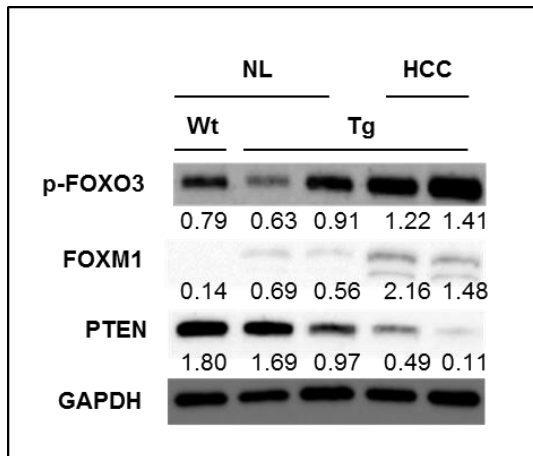

**Figure S4. Differential expression of phospho-FOXO3, FOXM1 and PTEN in normal liver and cancer tissues in TG221 mice.** Western blot analysis of liver proteins from normal liver of B6D2F2 wild type (wt), TG221 transgenic mice, and liver hepatocellular carcinoma (HCC) from TG221. The analyses showed that HCCs exhibited a higher phosphorylation of FOXO3, upregulation of FOXM1, and downregulation of PTEN compared to normal livers. A slight upregulation of FOXM1 and downregulation of PTEN were observed in normal liver from TG221 mice compared to wt mice. Glyceraldehyde-3-phosphate dehydrogenase (GAPDH) was used as an internal normalizer.

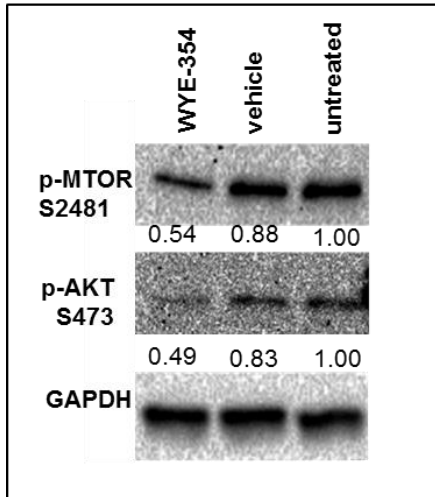

**Figure S5. WYE-354 inhibited *in vivo* phosphorylation of AKT and MTOR.** Western blot analysis of liver protein extracts from mice treated with WYE-354 and controls. The inhibition of phosphorylation of Akt (S-473) and MTOR (S-2481) was detected in mice treated with WYE-354 compared to control animals. GAPDH was used as an internal normalizer.

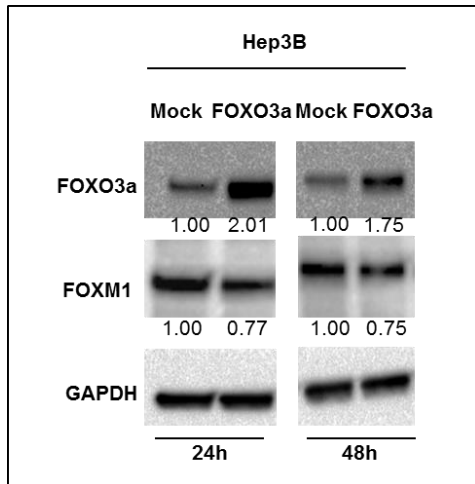

**Figure S6. FOXO3A over-expression inhibited FOXM1 expression.** Hep3B cells were transfected with a mammalian plasmid vector over-expressing FOXO3a. Cells were collected 24 and 48 h after transfection, and proteins were analyzed by western blot. The over-expression of FOXO3a induced a decrease in FOXM1 levels. Glyceraldehyde-3-phosphate dehydrogenase (GAPDH) was used as an internal normalizer.

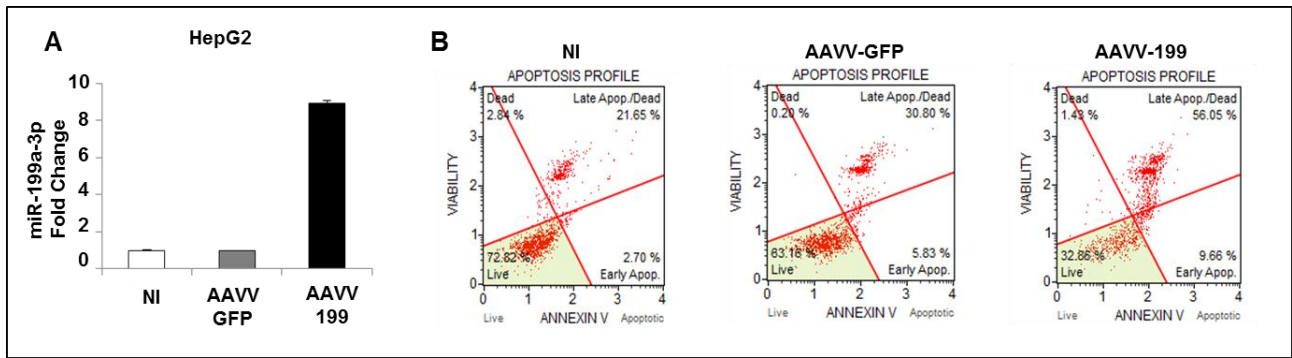

**Figure S7. Increased expression of miR-199a-3p enhanced apoptosis levels in HepG2 cells.** (A) HepG2 cells were infected with an Adeno Associated Virus (AAVV) expressing miR-199a-3p (AAVV-199). The increase in miR-199a-3p expression levels was detected in the infected cells by quantitative polymerase chain reaction (qPCR). All the data reported are an average of the experiment performed in triplicate. (B). The increased expression of miR-199a-3p caused a statistically significant increase in the percentage of total apoptotic cells compared to the controls ( $p < 0.0001$ ), while AAVV-green fluorescent protein (GFP) effect on cells viability was comparable to the uninfected control (NI). Data are represented as mean + SD.
